# Supplementary material for: Translational Modeling to Guide Study Design and Dose Choice in Obesity Exemplified by AZD1979, a Melanin‐concentrating Hormone Receptor 1 Antagonist
Source: PubMed Central journal article supplement — CPT Pharmacometrics Syst Pharmacol. 2017 May 27;6(7):458–68. doi: 10.1002/psp4.12199 (PMC5529746; doi:10.1002/psp4.12199), 2017-05-27
Supplement: PSP4-6-458-s003.pdf [file PSP4-6-458-s003.pdf]

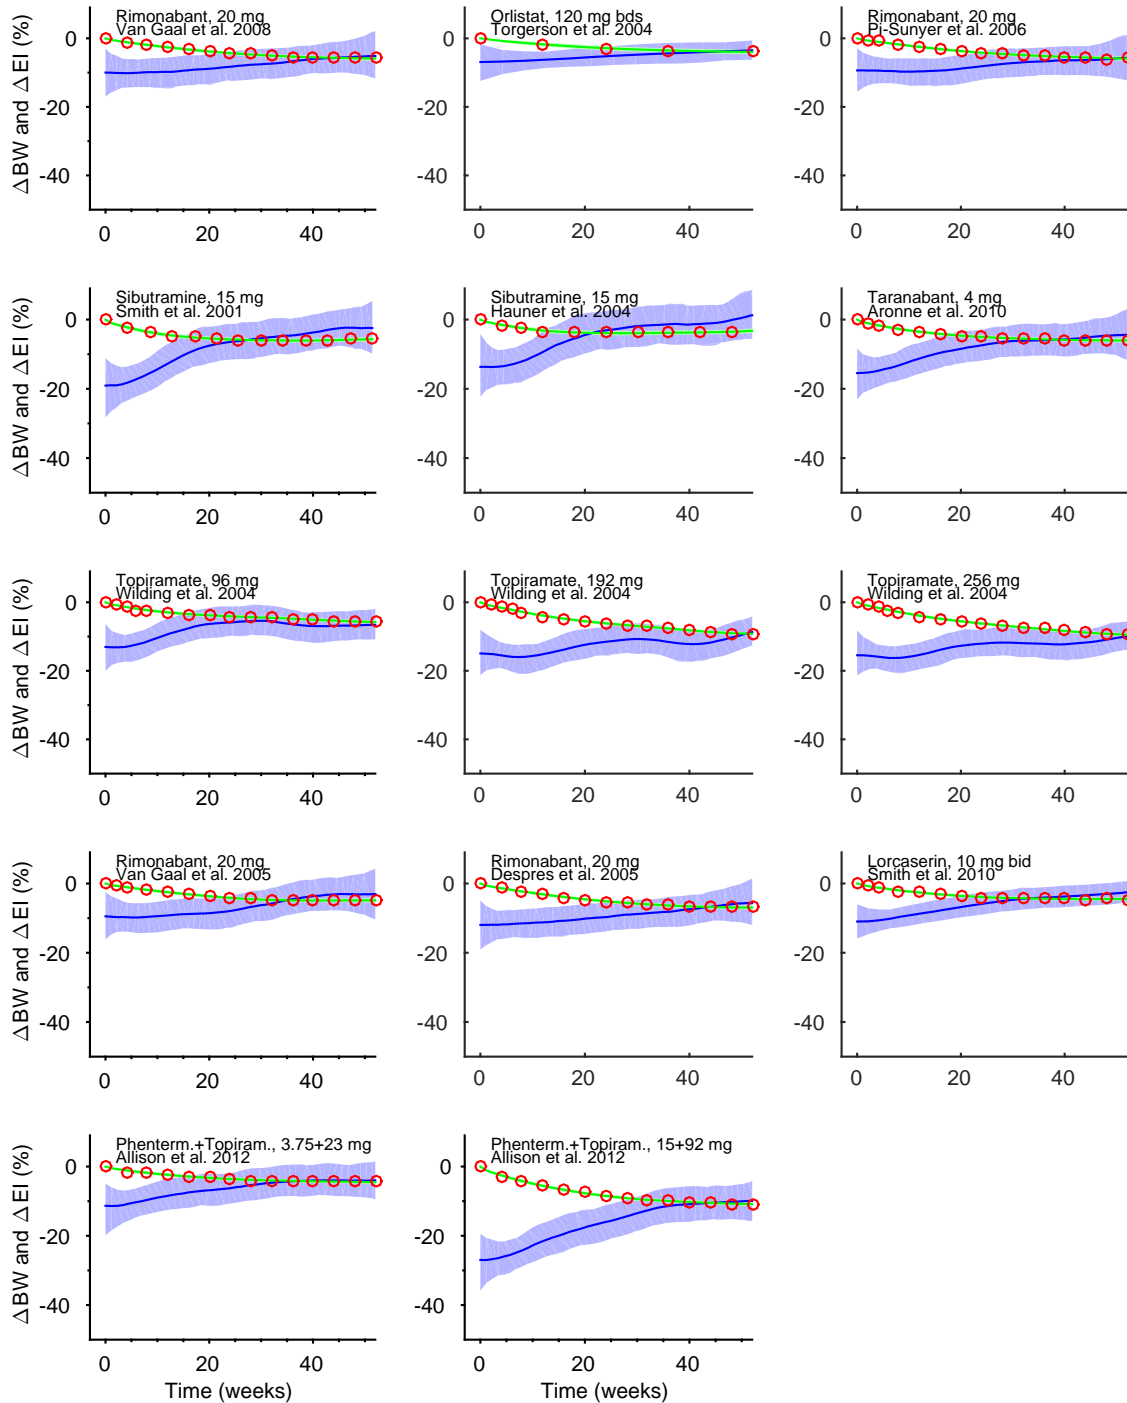

**Supplementary Figure 2.** Body weight to energy intake in human (Step 1) for placebo-corrected data. Body-weight data (red circles) from fourteen key studies with rimonabant, orlistat, sibutramine, taranabant, topiramate, lorcaserin, and phentermine. Non-parametric input-estimation was used to predict energy intake (blue line) by regressing Hall's body-composition model (Hall 2011) on body-weight observations. The predicted body-weight curves are indicated by green lines. A 1% (peak) drug induced energy-expenditure effect was assumed. BW=body weight, EI=energy intake. The shaded areas are 95% credible intervals of energy intake and body weight.
