# Supplementary material for: Translational Modeling to Guide Study Design and Dose Choice in Obesity Exemplified by AZD1979, a Melanin‐concentrating Hormone Receptor 1 Antagonist
Source: PubMed Central journal article supplement — CPT Pharmacometrics Syst Pharmacol. 2017 May 27;6(7):458–68. doi: 10.1002/psp4.12199 (PMC5529746; doi:10.1002/psp4.12199), 2017-05-27
Supplement: PSP4-6-458-s004.pdf [file PSP4-6-458-s004.pdf]

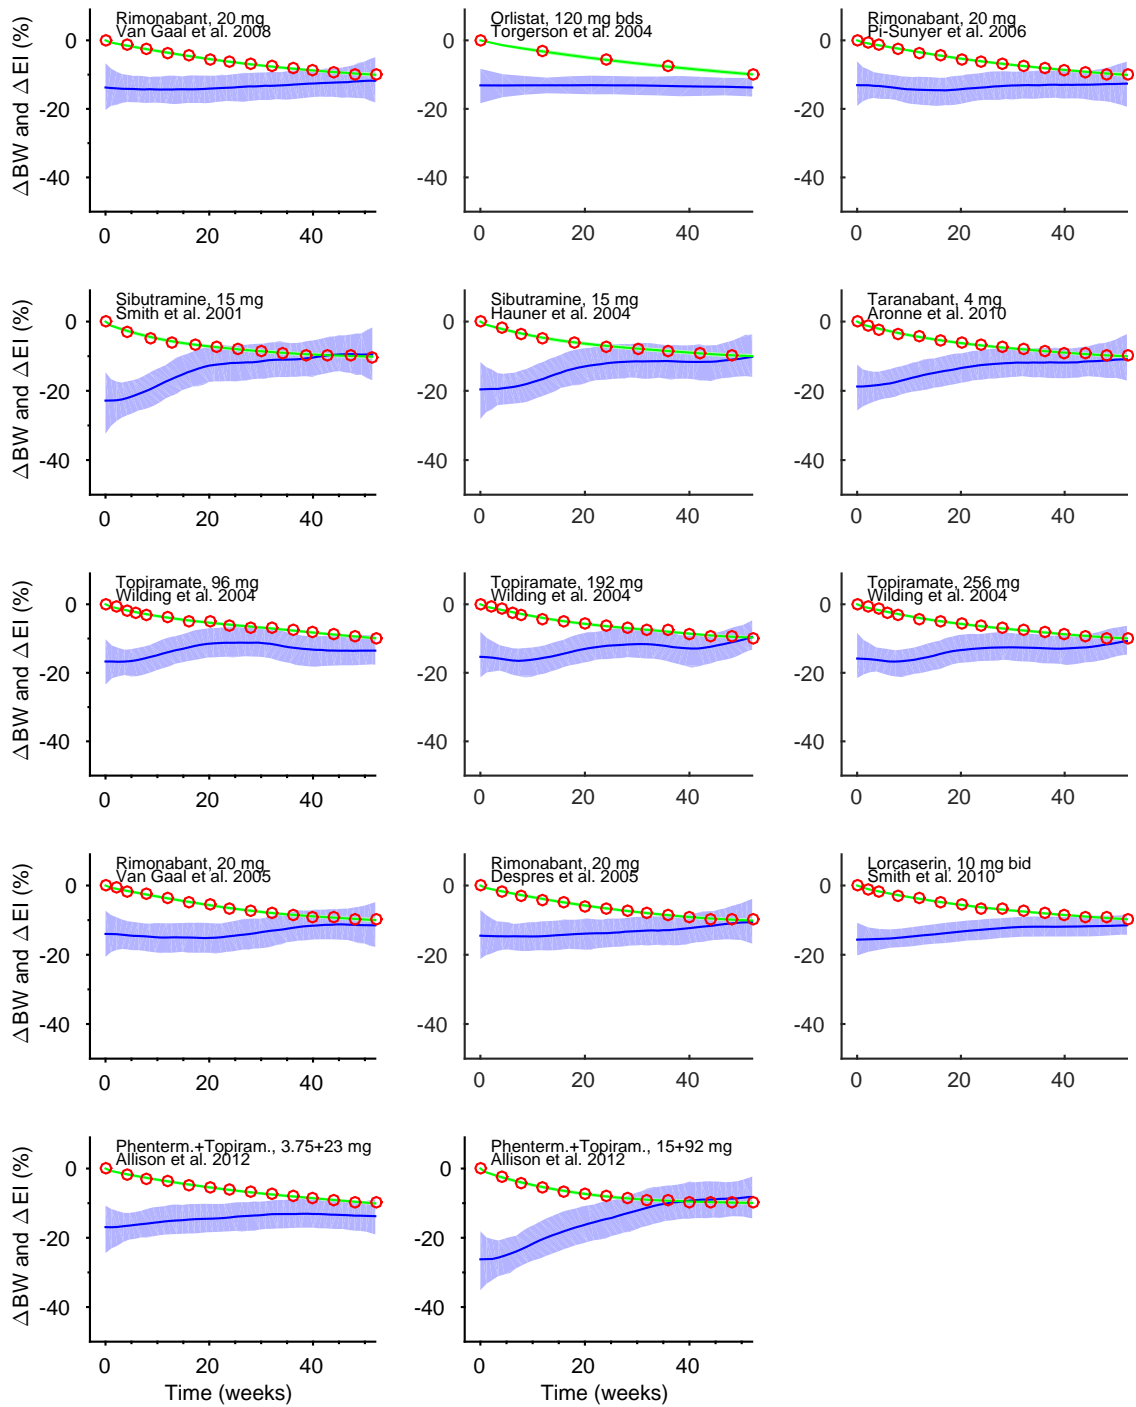

**Supplementary Figure 3.** Body weight to energy intake in human for placebo-corrected data (Step 1). Transformed summary curves of the 14 clinical studies reported in Supplementary Figure 2. On average, 14% energy-intake reduction is predicted to give 10% body-weight reduction over one year.
