# Supplementary material for: Translational Modeling to Guide Study Design and Dose Choice in Obesity Exemplified by AZD1979, a Melanin‐concentrating Hormone Receptor 1 Antagonist
Source: PubMed Central journal article supplement — CPT Pharmacometrics Syst Pharmacol. 2017 May 27;6(7):458–68. doi: 10.1002/psp4.12199 (PMC5529746; doi:10.1002/psp4.12199), 2017-05-27
Supplement: PSP4-6-458-s006.pdf [file PSP4-6-458-s006.pdf]

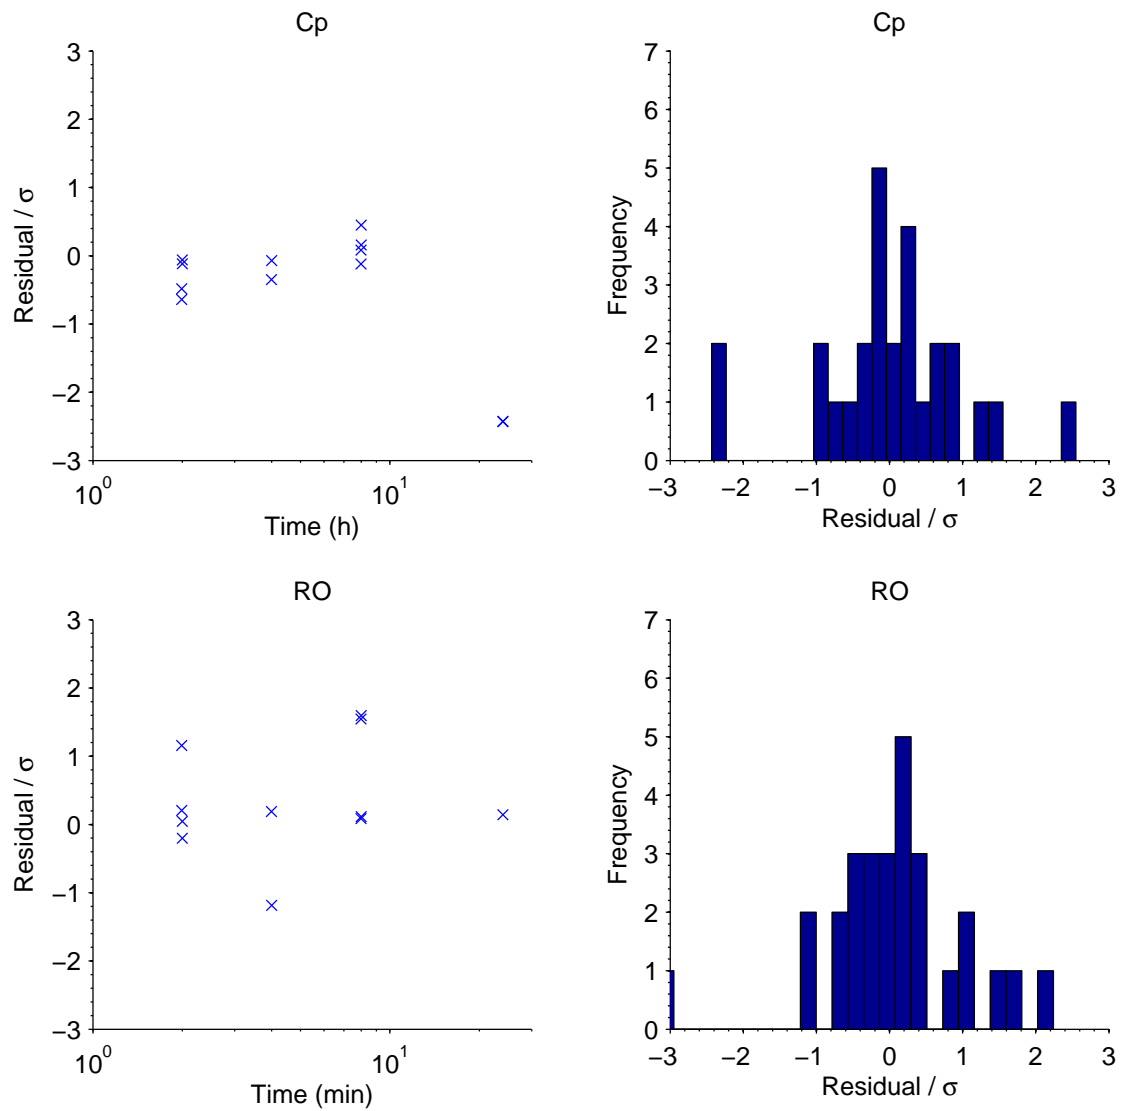

**Supplementary Figure 5.** Residual plots corresponding to the model fit in Figure 4. Each row corresponds to one observed variable. The left column displays residuals divided by the estimated  $\sigma$  for each variable, and over sampling times. The right column shows the corresponding histograms for the residuals, collected over all sampling points.
