# Supplementary material for: Translational Modeling to Guide Study Design and Dose Choice in Obesity Exemplified by AZD1979, a Melanin‐concentrating Hormone Receptor 1 Antagonist
Source: PubMed Central journal article supplement — CPT Pharmacometrics Syst Pharmacol. 2017 May 27;6(7):458–68. doi: 10.1002/psp4.12199 (PMC5529746; doi:10.1002/psp4.12199), 2017-05-27
Supplement: PSP4-6-458-s007.pdf [file PSP4-6-458-s007.pdf]

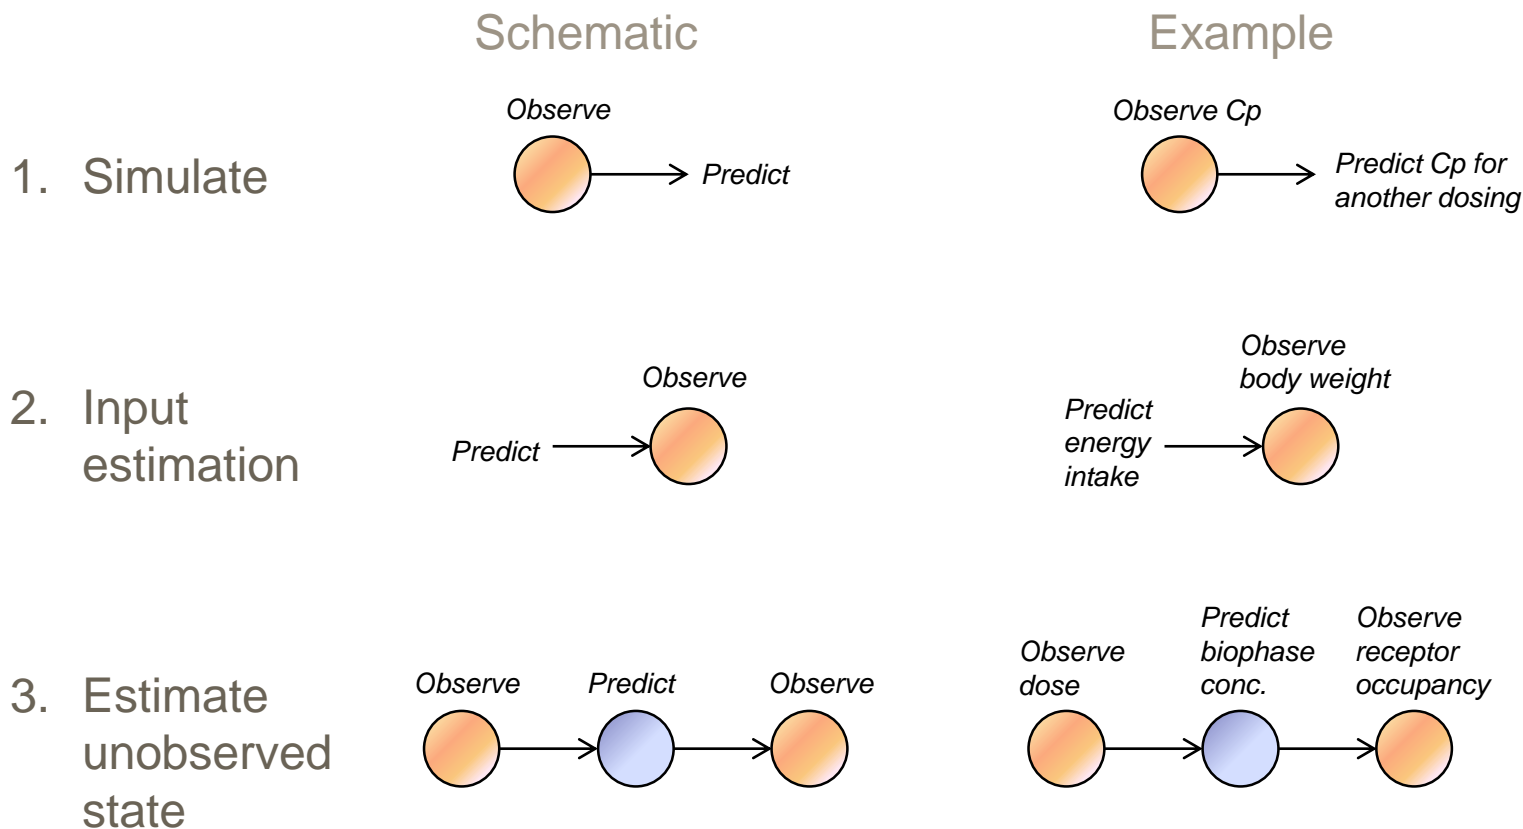

**Supplementary Figure 6. Fundamental operations on model representations of the biomarker chain.** The AZD1979 case study considers two fundamental computational operations on model representations of the biomarker chain: traditional forward simulation and input estimation. By complementing these two operations with estimation of an unobserved biomarker causally preceded and followed by observed biomarkers, a set of three fundamental computational operations is established. We believe that user-friendly software tools for these three operations constitute one important factor for improving quality and increasing speed in the data analysis of drug discovery programmes.
