# Supplementary material for: Translational Modeling to Guide Study Design and Dose Choice in Obesity Exemplified by AZD1979, a Melanin‐concentrating Hormone Receptor 1 Antagonist
Source: PubMed Central journal article supplement — CPT Pharmacometrics Syst Pharmacol. 2017 May 27;6(7):458–68. doi: 10.1002/psp4.12199 (PMC5529746; doi:10.1002/psp4.12199), 2017-05-27
Supplement: PSP4-6-458-s008.pdf [file PSP4-6-458-s008.pdf]

| <b>Time</b>      | <b>Body-weight decrease (%)</b> | <b>Energy-intake decrease (%)</b> |
|------------------|---------------------------------|-----------------------------------|
| <b>1 week</b>    | 0.7                             | 16                                |
| <b>2 weeks</b>   | 1.0                             | 16                                |
| <b>1 months</b>  | 1.8                             | 16                                |
| <b>3 months</b>  | 4.2                             | 16                                |
| <b>6 months</b>  | 6.8                             | 15                                |
| <b>12 months</b> | 10                              | 14                                |

**Supplementary Table 1.** Predicted decrease in BW and EI (mean over the time period) when targeting 10% BW decrease in one year (reported values are the medians from the 14 considered clinical studies). Analysis is based on placebo-corrected BW data.
