# Supplementary material for: Translational Modeling to Guide Study Design and Dose Choice in Obesity Exemplified by AZD1979, a Melanin‐concentrating Hormone Receptor 1 Antagonist
Source: PubMed Central journal article supplement — CPT Pharmacometrics Syst Pharmacol. 2017 May 27;6(7):458–68. doi: 10.1002/psp4.12199 (PMC5529746; doi:10.1002/psp4.12199), 2017-05-27
Supplement: PSP4-6-458-s009.pdf [file PSP4-6-458-s009.pdf]

|                                                                   | <b>Rat</b> | <b>Dog</b> | <b>Human</b>             |
|-------------------------------------------------------------------|------------|------------|--------------------------|
| <b>CL (mL/min/kg)</b>                                             | 8.7 (9.9*) | 37 (26*)   | 8.6*                     |
| <b>V<sub>ss</sub> (L/kg)</b>                                      | 2.0        | 5.4        | 4*                       |
| <b>t<sub>1/2</sub> (h)</b>                                        | 1.8        | 1.7        | 5.4*                     |
| <b>F (%)</b>                                                      | 92         | 17.5       | 60*                      |
| <b>Plasma protein binding (% free)</b>                            | 10         | 36         | 26                       |
| <b>CL<sub>int</sub> hepatocytes (μl/min/10<sup>6</sup> cells)</b> | 5.1        | 24         | 10.6<br>(stdev 2.2, N=3) |

**Supplementary Table 2.** Pharmacokinetic data observed in the rat and the dog, and predicted (\*) or observed in human. Plasma protein binding in mouse was 25%.
